# Supplementary material for: Carbon and Nitrogen Allocation between the Sink and Source Leaf Tissue in Response to the Excess Excitation Energy Conditions
Source: MDPI journal article supplement (doi:10.3390/ijms24032269), 2023-01-23
Supplement: s1 [file s1]

**Table S3.** Three-way ANOVA results for the effects of tissue type (GL and WL), time point (9<sup>th</sup> and 13<sup>th</sup> day) and two PAR intensities as well as their interaction on the content of phenolic compounds found in the leaves of *P. zonale* plants. Experimental conditions were as described in Figure 4. The *Dfs* are shown in the brackets (the first number represents *Df* of main effects and their interactions and the second number is *Df* of error). CA, caffeic Cat: catechin, acid, HBAs, total hydroxybenzoic acids; K, kaempferol; *p*-CA, *p*-coumaric acid; *p*-CA der, *p*-coumaric acid derivative; Q, quercetin; SyA, syringic acid.

| HL experiment                              |                            |              |                     |                                                |                            |               |                     |
|--------------------------------------------|----------------------------|--------------|---------------------|------------------------------------------------|----------------------------|---------------|---------------------|
| Trait                                      | Source of variation        | <i>F</i>     | <i>P</i> > <i>F</i> | Trait                                          | Source of variation        | <i>F</i>      | <i>P</i> > <i>F</i> |
| <b>Cat</b><br>( <i>Df</i> : 1; 59)         | <b>tissue</b>              | <b>10.51</b> | <b>0.0020</b>       | <b>SyA</b><br>( <i>Df</i> : 1; 59)             | <b>tissue</b>              | <b>102.60</b> | <b>&lt; 0.0001</b>  |
|                                            | <b>time</b>                | <b>10.85</b> | <b>&lt; 0.0001</b>  |                                                | <b>time</b>                | <b>7.05</b>   | <b>0.0020</b>       |
|                                            | PAR                        | 0.06         | 0.8010              |                                                | <b>PAR</b>                 | <b>62.07</b>  | <b>&lt; 0.0001</b>  |
|                                            | tissue × time              | 2.94         | 0.0620              |                                                | tissue × time              | 0.44          | 0.6480              |
|                                            | tissue × PAR               | 1.88         | 0.1760              |                                                | <b>tissue × PAR</b>        | <b>10.96</b>  | <b>0.0020</b>       |
|                                            | time × PAR                 | 0.11         | 0.7420              |                                                | time × PAR                 | 0.04          | 0.8480              |
|                                            | <b>tissue × time × PAR</b> | <b>7.45</b>  | <b>0.0090</b>       |                                                | <b>tissue × time × PAR</b> | <b>6.70</b>   | <b>0.0130</b>       |
| <b>HBAs</b><br>( <i>Df</i> : 1; 59)        | <b>tissue</b>              | <b>6.38</b>  | <b>0.0150</b>       | <b>CA</b><br>( <i>Df</i> : 1; 59)              | <b>tissue</b>              | <b>5.43</b>   | <b>0.0240</b>       |
|                                            | <b>time</b>                | <b>13.14</b> | <b>&lt; 0.0001</b>  |                                                | <b>time</b>                | <b>13.41</b>  | <b>&lt; 0.0001</b>  |
|                                            | PAR                        | 1.87         | 0.1780              |                                                | <b>PAR</b>                 | <b>70.68</b>  | <b>&lt; 0.0001</b>  |
|                                            | <b>tissue × time</b>       | <b>6.00</b>  | <b>0.0050</b>       |                                                | tissue × time              | 1.75          | 0.1840              |
|                                            | tissue × PAR               | 0.17         | 0.6850              |                                                | tissue × PAR               | 0.15          | 0.7010              |
|                                            | time × PAR                 | 0.08         | 0.7810              |                                                | <b>time × PAR</b>          | <b>33.86</b>  | <b>&lt; 0.0001</b>  |
|                                            | <b>tissue × time × PAR</b> | <b>20.20</b> | <b>&lt; 0.0001</b>  |                                                | tissue × time × PAR        | 2.65          | 0.1100              |
| <b><i>p</i>-CA</b><br>( <i>Df</i> : 1; 59) | <b>tissue</b>              | <b>29.54</b> | <b>&lt; 0.0001</b>  | <b><i>p</i>-CA der</b><br>( <i>Df</i> : 1; 59) | <b>tissue</b>              | <b>26.7</b>   | <b>&lt; 0.0001</b>  |
|                                            | <b>time</b>                | <b>4.32</b>  | <b>0.0190</b>       |                                                | time                       | 3.0           | 0.0590              |
|                                            | <b>PAR</b>                 | <b>25.32</b> | <b>&lt; 0.0001</b>  |                                                | <b>PAR</b>                 | <b>31.1</b>   | <b>&lt; 0.0001</b>  |
|                                            | tissue × time              | 0.52         | 0.5980              |                                                | tissue × time              | 0.1           | 0.9360              |
|                                            | tissue × PAR               | 1.65         | 0.2050              |                                                | tissue × PAR               | 3.2           | 0.0770              |
|                                            | time × PAR                 | 2.84         | 0.0980              |                                                | time × PAR                 | 1.3           | 0.2690              |
|                                            | tissue × time × PAR        | 0.52         | 0.4730              |                                                | tissue × time × PAR        | 0.1           | 0.7140              |
| <b>Q</b><br>( <i>Df</i> : 1; 59)           | <b>tissue</b>              | <b>44.08</b> | <b>&lt; 0.0001</b>  | <b>K</b><br>( <i>Df</i> : 1; 59)               | <b>tissue</b>              | <b>59.04</b>  | <b>&lt; 0.0001</b>  |
|                                            | <b>time</b>                | <b>12.81</b> | <b>&lt; 0.0001</b>  |                                                | <b>time</b>                | <b>18.19</b>  | <b>&lt; 0.0001</b>  |
|                                            | PAR                        | 1.97         | 0.1670              |                                                | <b>PAR</b>                 | <b>51.01</b>  | <b>&lt; 0.0001</b>  |
|                                            | tissue × time              | 2.10         | 0.1330              |                                                | tissue × time              | 3.05          | 0.0560              |
|                                            | <b>tissue × PAR</b>        | <b>5.59</b>  | <b>0.0220</b>       |                                                | <b>tissue × PAR</b>        | <b>14.34</b>  | <b>&lt; 0.0001</b>  |
|                                            | time × PAR                 | 0.18         | 0.6750              |                                                | <b>time × PAR</b>          | <b>4.50</b>   | <b>0.0390</b>       |
|                                            | tissue × time × PAR        | 0.81         | 0.3730              |                                                | tissue × time × PAR        | 0.83          | 0.3660              |
| COLD + HL experiment                       |                            |              |                     |                                                |                            |               |                     |
| Trait                                      | Source of variation        | <i>F</i>     | <i>P</i> > <i>F</i> | Trait                                          | Source of variation        | <i>F</i>      | <i>P</i> > <i>F</i> |
| <b>Cat</b><br>( <i>Df</i> : 1; 69)         | <b>tissue</b>              | 66.76        | <b>&lt; 0.0001</b>  | <b>SyA</b><br>( <i>Df</i> : 1; 59)             | <b>tissue</b>              | <b>235.14</b> | <b>&lt; 0.0001</b>  |
|                                            | <b>time</b>                | 24.60        | <b>&lt; 0.0001</b>  |                                                | <b>time</b>                | <b>15.46</b>  | <b>&lt; 0.0001</b>  |
|                                            | <b>PAR</b>                 | 41.31        | <b>&lt; 0.0001</b>  |                                                | <b>PAR</b>                 | <b>133.39</b> | <b>&lt; 0.0001</b>  |
|                                            | <b>tissue × time</b>       | 25.88        | <b>&lt; 0.0001</b>  |                                                | <b>tissue × time</b>       | <b>12.61</b>  | <b>&lt; 0.0001</b>  |
|                                            | <b>tissue × PAR</b>        | 44.37        | <b>&lt; 0.0001</b>  |                                                | <b>tissue × PAR</b>        | <b>64.19</b>  | <b>&lt; 0.0001</b>  |

|             |                            |               |                    |                 |                            |               |                    |
|-------------|----------------------------|---------------|--------------------|-----------------|----------------------------|---------------|--------------------|
|             | <b>time × PAR</b>          | 69.09         | <b>&lt; 0.0001</b> |                 | <b>time × PAR</b>          | <b>21.18</b>  | <b>&lt; 0.0001</b> |
|             | <b>tissue × time × PAR</b> | 33.17         | <b>&lt; 0.0001</b> |                 | <b>tissue × time × PAR</b> | <b>7.86</b>   | <b>0.0070</b>      |
| <b>HBA</b>  | <b>tissue</b>              | <b>70.83</b>  | <b>&lt; 0.0001</b> | <b>CA</b>       | tissue                     | 0.02          | 0.8840             |
| (Df: 1; 69) | <b>time</b>                | <b>6.11</b>   | <b>0.0040</b>      | (Df: 1; 69)     | time                       | 1.84          | 0.1670             |
|             | <b>PAR</b>                 | <b>28.10</b>  | <b>&lt; 0.0001</b> |                 | <b>PAR</b>                 | <b>11.39</b>  | <b>0.0010</b>      |
|             | <b>tissue × time</b>       | <b>3.81</b>   | <b>0.0280</b>      |                 | <b>tissue × time</b>       | <b>3.73</b>   | <b>0.0300</b>      |
|             | <b>tissue × PAR</b>        | <b>12.17</b>  | <b>0.0010</b>      |                 | tissue × PAR               | 0.12          | 0.7360             |
|             | <b>time × PAR</b>          | <b>17.88</b>  | <b>&lt; 0.0001</b> |                 | time × PAR                 | 1.95          | 0.1680             |
|             | tissue × time × PAR        | 2.05          | 0.1570             |                 | tissue × time × PAR        | 0.49          | 0.4860             |
| <b>p-CA</b> | <b>tissue</b>              | <b>57.16</b>  | <b>&lt; 0.0001</b> | <b>p-CA der</b> | <b>tissue</b>              | <b>64.35</b>  | <b>&lt; 0.0001</b> |
| (Df: 1; 69) | <b>time</b>                | <b>19.99</b>  | <b>&lt; 0.0001</b> | (Df: 1; 69)     | <b>time</b>                | <b>20.11</b>  | <b>&lt; 0.0001</b> |
|             | PAR                        | 0.65          | 0.4230             |                 | PAR                        | 1.04          | 0.3130             |
|             | tissue × time              | 1.77          | 0.1790             |                 | <b>tissue × time</b>       | <b>3.16</b>   | <b>0.0490</b>      |
|             | tissue × PAR               | 0.03          | 0.8620             |                 | tissue × PAR               | 0.28          | 0.6010             |
|             | <b>time × PAR</b>          | <b>9.16</b>   | <b>0.0040</b>      |                 | time × PAR                 | 3.16          | 0.0810             |
|             | tissue × time × PAR        | 2.35          | 0.1300             |                 | tissue × time × PAR        | 1.13          | 0.2930             |
| <b>Q</b>    | tissue                     | 0.43          | 0.5170             | <b>K</b>        | tissue                     | 1.04          | 0.3110             |
| (Df: 1; 59) | <b>time</b>                | <b>9.90</b>   | <b>&lt; 0.0001</b> | (Df: 1; 69)     | <b>time</b>                | <b>58.31</b>  | <b>&lt; 0.0001</b> |
|             | <b>PAR</b>                 | <b>114.92</b> | <b>&lt; 0.0001</b> |                 | <b>PAR</b>                 | <b>158.79</b> | <b>&lt; 0.0001</b> |
|             | tissue × time              | 0.81          | 0.4490             |                 | tissue × time              | 0.17          | 0.8430             |
|             | <b>tissue × PAR</b>        | <b>15.54</b>  | <b>&lt; 0.0001</b> |                 | <b>tissue × PAR</b>        | <b>4.49</b>   | <b>0.0380</b>      |
|             | <b>time × PAR</b>          | <b>34.08</b>  | <b>&lt; 0.0001</b> |                 | <b>time × PAR</b>          | <b>49.14</b>  | <b>&lt; 0.0001</b> |
|             | tissue × time × PAR        | 0.29          | 0.5950             |                 | tissue × time × PAR        | 0.00          | 0.9950             |
