# Supplementary material for: Carbon and Nitrogen Allocation between the Sink and Source Leaf Tissue in Response to the Excess Excitation Energy Conditions
Source: MDPI journal article supplement (doi:10.3390/ijms24032269), 2023-01-23
Supplement: s1 [file s1]

**Table S1.** Repeated-measures analysis of variance (profile analysis) on photosynthetic parameters determined during 13 days of the *HL* and *Cold+HL* experiments in the leaves of *P. zonale* plants. Experimental conditions were as described in Figure 1. The *Dfs* are shown in the brackets (the first number represents the *Df* of main effects and their interactions and the second number is the *Df* of error). Other abbreviations are explained in Figure 1.

***HL experiment, source***

| <i>Between-subjects</i> | $F_q'/F_m'$ ( <i>Df</i> : 1; 18) |                     | $\Phi_{PSII}$ ( <i>Df</i> : 1; 18) |                     | ETR ( <i>Df</i> : 1; 18) |                     | NPQ ( <i>Df</i> : 1; 18) |                     |
|-------------------------|----------------------------------|---------------------|------------------------------------|---------------------|--------------------------|---------------------|--------------------------|---------------------|
|                         | <i>F</i>                         | <i>P</i> > <i>F</i> | <i>F</i>                           | <i>P</i> > <i>F</i> | <i>F</i>                 | <i>P</i> > <i>F</i> | <i>F</i>                 | <i>P</i> > <i>F</i> |
| PAR                     | <b>114.33</b>                    | <b>&lt; 0.0001</b>  | <b>11.97</b>                       | <b>0.0030</b>       | <b>643.11</b>            | <b>&lt; 0.0001</b>  | <b>354.64</b>            | <b>&lt; 0.0001</b>  |
| <i>Within-subjects</i>  | $F_q'/F_m'$ ( <i>Df</i> : 1; 12) |                     | $\Phi_{PSII}$ ( <i>Df</i> : 1; 12) |                     | ETR ( <i>Df</i> : 1; 12) |                     | NPQ ( <i>Df</i> : 1; 12) |                     |
|                         | <i>F</i>                         | <i>P</i> > <i>F</i> | <i>F</i>                           | <i>P</i> > <i>F</i> | <i>F</i>                 | <i>P</i> > <i>F</i> | <i>F</i>                 | <i>P</i> > <i>F</i> |
| Day                     | <b>5.81</b>                      | <b>&lt; 0.0001</b>  | 1.56                               | 0.2237              | <b>34.46</b>             | <b>&lt; 0.0001</b>  | <b>16.78</b>             | <b>&lt; 0.0001</b>  |
| Day × PAR               | <b>6.78</b>                      | <b>&lt; 0.0001</b>  | 2.01                               | 0.1570              | <b>30.42</b>             | <b>&lt; 0.0001</b>  | <b>14.54</b>             | <b>&lt; 0.0001</b>  |

***COLD + HL experiment, source***

| <i>Between-subjects</i> | $F_q'/F_m'$ ( <i>Df</i> : 1; 42) |                     | $\Phi_{PSII}$ ( <i>Df</i> : 1; 42) |                     | ETR ( <i>Df</i> : 1; 42) |                     | NPQ ( <i>Df</i> : 1; 42) |                     |
|-------------------------|----------------------------------|---------------------|------------------------------------|---------------------|--------------------------|---------------------|--------------------------|---------------------|
|                         | <i>F</i>                         | <i>P</i> > <i>F</i> | <i>F</i>                           | <i>P</i> > <i>F</i> | <i>F</i>                 | <i>P</i> > <i>F</i> | <i>F</i>                 | <i>P</i> > <i>F</i> |
| PAR                     | <b>340.75</b>                    | <b>&lt; 0.0001</b>  | 55.30                              | 0.5684              | <b>698.46</b>            | <b>&lt; 0.0001</b>  | 299.0                    | 0.8768              |
| <i>Within-subjects</i>  | $F_q'/F_m'$ ( <i>Df</i> : 1; 12) |                     | $\Phi_{PSII}$ ( <i>Df</i> : 1; 12) |                     | ETR ( <i>Df</i> : 1; 12) |                     | NPQ ( <i>Df</i> : 1; 12) |                     |
|                         | <i>F</i>                         | <i>P</i> > <i>F</i> | <i>F</i>                           | <i>P</i> > <i>F</i> | <i>F</i>                 | <i>P</i> > <i>F</i> | <i>F</i>                 | <i>P</i> > <i>F</i> |
| Day                     | <b>34.80</b>                     | <b>&lt; 0.0001</b>  | <b>7.64</b>                        | <b>&lt; 0.0001</b>  | <b>111.01</b>            | <b>&lt; 0.0001</b>  | <b>57.42</b>             | <b>&lt; 0.0001</b>  |
| Day × PAR               | <b>32.26</b>                     | <b>&lt; 0.0001</b>  | <b>8.25</b>                        | <b>&lt; 0.0001</b>  | <b>103.93</b>            | <b>&lt; 0.0001</b>  | <b>52.16</b>             | <b>&lt; 0.0001</b>  |
