# Supplementary material for: Carbon and Nitrogen Allocation between the Sink and Source Leaf Tissue in Response to the Excess Excitation Energy Conditions
Source: MDPI journal article supplement (doi:10.3390/ijms24032269), 2023-01-23
Supplement: s1 [file s1]

**Table S6.** Three-way ANOVA results for the effects of tissue type (GL and WL), time point (9<sup>th</sup> and 13<sup>th</sup> day) and two PAR intensities as well as their interaction on the content of phenolic compounds found in the leaves of *P. zonale* plants. Experimental conditions were as described in Figure 4. The *Dfs* are shown in the brackets (the first number represents *Df* of the main effects and their interactions and the second number is *Df* of error).

| HL experiment                       |                            |               |                     |                                    |                            |              |                     |
|-------------------------------------|----------------------------|---------------|---------------------|------------------------------------|----------------------------|--------------|---------------------|
| Trait                               | Source of variation        | <i>F</i>      | <i>P</i> > <i>F</i> | Trait                              | Source of variation        | <i>F</i>     | <i>P</i> > <i>F</i> |
| <b>Val</b><br>( <i>Df</i> : 1; 69)  | <b>tissue</b>              | <b>11.38</b>  | <b>0.0010</b>       | <b>Ala</b><br>( <i>Df</i> : 1; 69) | tissue                     | 1.07         | 0.305               |
|                                     | <b>time</b>                | <b>31.58</b>  | <b>&lt; 0.0001</b>  |                                    | <b>time</b>                | <b>17.71</b> | <b>&lt; 0.0001</b>  |
|                                     | <b>PAR</b>                 | <b>16.36</b>  | <b>&lt; 0.0001</b>  |                                    | <b>PAR</b>                 | <b>57.06</b> | <b>&lt; 0.0001</b>  |
|                                     | <b>tissue × time</b>       | <b>16.70</b>  | <b>&lt; 0.0001</b>  |                                    | <b>tissue × time</b>       | <b>5.38</b>  | <b>0.0070</b>       |
|                                     | tissue × PAR               | 3.54          | 0.0650              |                                    | <b>tissue × PAR</b>        | <b>6.01</b>  | <b>0.0170</b>       |
|                                     | <b>time × PAR</b>          | <b>15.77</b>  | <b>&lt; 0.0001</b>  |                                    | <b>time × PAR</b>          | <b>9.75</b>  | <b>0.0030</b>       |
|                                     | <b>tissue × time × PAR</b> | <b>14.57</b>  | <b>&lt; 0.0001</b>  |                                    | tissue × time × PAR        | 0.08         | 0.7780              |
| <b>Ile</b><br>( <i>Df</i> : 1; 69)  | <b>tissue</b>              | <b>12.81</b>  | <b>0.0010</b>       | <b>Leu</b><br>( <i>Df</i> : 1; 69) | <b>tissue</b>              | <b>17.70</b> | <b>&lt; 0.0001</b>  |
|                                     | <b>time</b>                | <b>4.96</b>   | <b>0.0100</b>       |                                    | <b>time</b>                | <b>4.93</b>  | <b>0.0100</b>       |
|                                     | <b>PAR</b>                 | <b>4.10</b>   | <b>0.0470</b>       |                                    | <b>PAR</b>                 | <b>4.64</b>  | <b>0.0350</b>       |
|                                     | <b>tissue × time</b>       | <b>3.34</b>   | <b>0.0420</b>       |                                    | tissue × time              | 0.23         | 0.7950              |
|                                     | tissue × PAR               | 0.84          | 0.3640              |                                    | tissue × PAR               | 0.71         | 0.4020              |
|                                     | time × PAR                 | 2.61          | 0.1110              |                                    | time × PAR                 | 0.28         | 0.6010              |
|                                     | tissue × time × PAR        | 2.72          | 0.1040              |                                    | tissue × time × PAR        | 2.01         | 0.1610              |
| <b>GABA</b><br>( <i>Df</i> : 1; 69) | <b>tissue</b>              | <b>10.01</b>  | <b>0.0020</b>       | <b>Pro</b><br>( <i>Df</i> : 1; 69) | <b>tissue</b>              | <b>10.98</b> | <b>0.0020</b>       |
|                                     | <b>time</b>                | 1.82          | 0.1700              |                                    | <b>time</b>                | <b>7.13</b>  | <b>0.0020</b>       |
|                                     | <b>PAR</b>                 | <b>7.11</b>   | <b>0.0100</b>       |                                    | PAR                        | 2.58         | 0.1130              |
|                                     | tissue × time              | 1.95          | 0.1510              |                                    | <b>tissue × time</b>       | <b>4.58</b>  | <b>0.0140</b>       |
|                                     | tissue × PAR               | 0.00          | 0.9880              |                                    | tissue × PAR               | 0.02         | 0.8780              |
|                                     | time × PAR                 | 2.40          | 0.1260              |                                    | time × PAR                 | 2.12         | 0.1500              |
|                                     | tissue × time × PAR        | 0.00          | 0.9930              |                                    | tissue × time × PAR        | 2.20         | 0.1430              |
| <b>Met</b><br>( <i>Df</i> : 1; 69)  | <b>tissue</b>              | <b>129.54</b> | <b>&lt; 0.0001</b>  | <b>Ser</b><br>( <i>Df</i> : 1; 69) | <b>tissue</b>              | <b>27.98</b> | <b>&lt; 0.0001</b>  |
|                                     | <b>time</b>                | <b>5.24</b>   | <b>0.0080</b>       |                                    | <b>time</b>                | <b>23.58</b> | <b>&lt; 0.0001</b>  |
|                                     | PAR                        | 3.03          | 0.0870              |                                    | <b>PAR</b>                 | <b>11.24</b> | <b>0.0010</b>       |
|                                     | <b>tissue × time</b>       | <b>8.92</b>   | <b>&lt; 0.0001</b>  |                                    | <b>tissue × time</b>       | <b>7.07</b>  | <b>0.0020</b>       |
|                                     | tissue × PAR               | 0.19          | 0.6610              |                                    | <b>tissue × PAR</b>        | <b>6.86</b>  | <b>0.0110</b>       |
|                                     | time × PAR                 | 0.13          | 0.7160              |                                    | time × PAR                 | 1.10         | 0.2990              |
|                                     | tissue × time × PAR        | 0.08          | 0.7730              |                                    | <b>tissue × time × PAR</b> | <b>6.97</b>  | <b>0.0110</b>       |
| <b>Thr</b><br>( <i>Df</i> : 1; 69)  | <b>tissue</b>              | <b>51.45</b>  | <b>&lt; 0.0001</b>  | <b>Phe</b><br>( <i>Df</i> : 1; 69) | tissue                     | 2.34         | 0.1310              |
|                                     | <b>time</b>                | <b>30.28</b>  | <b>&lt; 0.0001</b>  |                                    | time                       | 1.49         | 0.2330              |
|                                     | <b>PAR</b>                 | <b>15.29</b>  | <b>&lt; 0.0001</b>  |                                    | PAR                        | 3.30         | 0.0740              |
|                                     | <b>tissue × time</b>       | <b>18.16</b>  | <b>&lt; 0.0001</b>  |                                    | tissue × time              | 0.95         | 0.3920              |
|                                     | tissue × PAR               | 2.20          | 0.1440              |                                    | tissue × PAR               | 1.68         | 0.2010              |
|                                     | time × PAR                 | 1.19          | 0.2800              |                                    | time × PAR                 | 0.06         | 0.8060              |
|                                     | tissue × time × PAR        | 1.06          | 0.3070              |                                    | tissue × time × PAR        | 0.00         | 0.9880              |

|                  |                      |               |                    |             |                            |              |                    |
|------------------|----------------------|---------------|--------------------|-------------|----------------------------|--------------|--------------------|
| <b>Asp</b>       | <b>tissue</b>        | <b>219.34</b> | <b>&lt; 0.0001</b> | <b>Glu</b>  | tissue                     | 0.58         | 0.4510             |
| (Df: 1; 69)      | time                 | 2.62          | 0.0810             | (Df: 1; 69) | <b>time</b>                | <b>8.20</b>  | <b>0.0010</b>      |
|                  | <b>PAR</b>           | <b>6.56</b>   | <b>0.0130</b>      |             | <b>PAR</b>                 | <b>7.67</b>  | <b>0.0070</b>      |
|                  | tissue × time        | 2.07          | 0.1350             |             | tissue × time              | 3.06         | 0.0550             |
|                  | tissue × PAR         | 1.32          | 0.2550             |             | tissue × PAR               | 2.85         | 0.0970             |
|                  | time × PAR           | 1.81          | 0.1840             |             | time × PAR                 | 0.49         | 0.4850             |
|                  | tissue × time × PAR  | 0.02          | 0.8800             |             | tissue × time × PAR        | 1.62         | 0.2080             |
| <b>Asn</b>       | <b>tissue</b>        | <b>76.48</b>  | <b>&lt; 0.0001</b> | <b>Gln</b>  | <b>tissue</b>              | <b>24.95</b> | <b>&lt; 0.0001</b> |
| (Df: 1; 69)      | <b>time</b>          | <b>20.93</b>  | <b>&lt; 0.0001</b> | (Df: 1; 69) | <b>time</b>                | <b>16.37</b> | <b>&lt; 0.0001</b> |
|                  | PAR                  | 0.16          | 0.6960             |             | PAR                        | 0.86         | 0.3570             |
|                  | <b>tissue × time</b> | <b>24.98</b>  | <b>&lt; 0.0001</b> |             | <b>tissue × time</b>       | <b>11.96</b> | <b>&lt; 0.0001</b> |
|                  | tissue × PAR         | 0.56          | 0.4560             |             | <b>tissue × PAR</b>        | <b>4.35</b>  | <b>0.0410</b>      |
|                  | time × PAR           | 0.82          | 0.3690             |             | <b>time × PAR</b>          | <b>4.36</b>  | <b>0.0410</b>      |
|                  | tissue × time × PAR  | 0.39          | 0.5350             |             | <b>tissue × time × PAR</b> | <b>5.45</b>  | <b>0.0230</b>      |
| <b>Tyr</b>       | <b>tissue</b>        | <b>7.03</b>   | <b>0.0100</b>      | <b>Gly</b>  | tissue                     | 1.09         | 0.3030             |
| (Df: 1; 69)      | time                 | 2.88          | 0.0640             | (Df: 1; 60) | time                       | 1.50         | 0.2340             |
|                  | PAR                  | 1.87          | 0.1770             |             | PAR                        | 0.06         | 0.8140             |
|                  | tissue × time        | 0.50          | 0.6110             |             | tissue × time              | 2.11         | 0.1320             |
|                  | tissue × PAR         | 1.32          | 0.2550             |             | tissue × PAR               | 0.09         | 0.7650             |
|                  | time × PAR           | 3.67          | 0.0600             |             | time × PAR                 | 0.66         | 0.4210             |
|                  | tissue × time × PAR  | 1.53          | 0.2210             |             | tissue × time × PAR        | 0.47         | 0.4980             |
| <b>Arg</b>       | <b>tissue</b>        | <b>24.37</b>  | <b>&lt; 0.0001</b> | <b>Cys</b>  | <b>tissue</b>              | <b>6.70</b>  | <b>0.0120</b>      |
| (Df: 1; 69)      | time                 | 1.71          | 0.1900             | (Df: 1; 69) | <b>time</b>                | <b>4.53</b>  | <b>0.0150</b>      |
|                  | PAR                  | 0.91          | 0.3450             |             | <b>PAR</b>                 | <b>4.41</b>  | <b>0.0400</b>      |
|                  | tissue × time        | 0.73          | 0.4850             |             | tissue × time              | 1.96         | 0.1500             |
|                  | tissue × PAR         | 0.00          | 0.9490             |             | tissue × PAR               | 1.19         | 0.2790             |
|                  | time × PAR           | 3.08          | 0.0850             |             | time × PAR                 | 1.40         | 0.2420             |
|                  | tissue × time × PAR  | 2.34          | 0.1310             |             | tissue × time × PAR        | 1.00         | 0.3210             |
| <b>Total AAs</b> | <b>tissue</b>        | <b>98.53</b>  | <b>&lt; 0.0001</b> |             |                            |              |                    |
| (Df: 1; 69)      | <b>time</b>          | <b>17.93</b>  | <b>&lt; 0.0001</b> |             |                            |              |                    |
|                  | <b>PAR</b>           | <b>25.11</b>  | <b>&lt; 0.0001</b> |             |                            |              |                    |
|                  | <b>tissue × time</b> | <b>10.33</b>  | <b>0.0001</b>      |             |                            |              |                    |
|                  | tissue × PAR         | 0.03          | 0.8668             |             |                            |              |                    |
|                  | time × PAR           | 0.07          | 0.7987             |             |                            |              |                    |
|                  | tissue × time × PAR  | 0.03          | 0.8625             |             |                            |              |                    |

#### COLD + HL experiment

| Trait       | Source of variation  | F            | P > F              | Trait       | Source of variation  | F            | P > F         |
|-------------|----------------------|--------------|--------------------|-------------|----------------------|--------------|---------------|
| <b>Val</b>  | <b>tissue</b>        | <b>49.85</b> | <b>&lt; 0.0001</b> | <b>Ala</b>  | <b>tissue</b>        | <b>12.15</b> | <b>0.0010</b> |
| (Df: 1; 69) | <b>time</b>          | <b>10.32</b> | <b>&lt; 0.0001</b> | (Df: 1; 69) | time                 | 0.25         | 0.7770        |
|             | <b>PAR</b>           | <b>6.61</b>  | <b>0.0130</b>      |             | PAR                  | 1.91         | 0.1720        |
|             | <b>tissue × time</b> | <b>11.67</b> | <b>&lt; 0.0001</b> |             | <b>tissue × time</b> | <b>4.18</b>  | <b>0.0200</b> |
|             | <b>tissue × PAR</b>  | <b>6.74</b>  | <b>0.0120</b>      |             | tissue × PAR         | 0.01         | 0.9120        |
|             | <b>time × PAR</b>    | <b>17.58</b> | <b>&lt; 0.0001</b> |             | time × PAR           | 3.09         | 0.0840        |

|             |                     |               |                    |             |                     |               |                    |
|-------------|---------------------|---------------|--------------------|-------------|---------------------|---------------|--------------------|
|             | tissue × time × PAR | 14.01         | < 0.0001           |             | tissue × time × PAR | 2.85          | 0.0970             |
| <b>Ile</b>  | <b>tissue</b>       | <b>106.83</b> | <b>&lt; 0.0001</b> | <b>Leu</b>  | <b>tissue</b>       | <b>140.68</b> | <b>&lt; 0.0001</b> |
| (Df: 1; 69) | time                | 0.38          | 0.6850             | (Df: 1; 69) | time                | 9.95          | < 0.0001           |
|             | PAR                 | 71.53         | < 0.0001           |             | PAR                 | 37.65         | < 0.0001           |
|             | tissue × time       | 6.10          | 0.0040             |             | tissue × time       | 14.02         | < 0.0001           |
|             | tissue × PAR        | 34.61         | < 0.0001           |             | tissue × PAR        | 39.16         | < 0.0001           |
|             | time × PAR          | 4.50          | 0.0380             |             | time × PAR          | 35.07         | < 0.0001           |
|             | tissue × time × PAR | 21.67         | < 0.0001           |             | tissue × time × PAR | 37.43         | < 0.0001           |
| <b>GABA</b> | <b>tissue</b>       | <b>3.83</b>   | <b>0.0600</b>      | <b>Pro</b>  | <b>tissue</b>       | <b>15.82</b>  | <b>&lt; 0.0001</b> |
| (Df: 1; 39) | time                | 7.12          | 0.0030             | (Df: 1; 69) | time                | 3.89          | 0.0260             |
|             | PAR                 | 15.34         | < 0.0001           |             | PAR                 | 0.69          | 0.4110             |
|             | tissue × time       | 17.55         | < 0.0001           |             | tissue × time       | 4.80          | 0.0120             |
|             | tissue × PAR        | 15.92         | < 0.0001           |             | tissue × PAR        | 2.43          | 0.1250             |
|             | time × PAR          | 10.91         | 0.0020             |             | time × PAR          | 0.57          | 0.4520             |
|             | tissue × time × PAR | 19.69         | < 0.0001           |             | tissue × time × PAR | 0.94          | 0.3360             |
| <b>Met</b>  | <b>tissue</b>       | <b>78.51</b>  | <b>&lt; 0.0001</b> | <b>Ser</b>  | <b>tissue</b>       | <b>74.00</b>  | <b>&lt; 0.0001</b> |
| (Df: 1; 69) | time                | 18.21         | < 0.0001           | (Df: 1; 69) | time                | 2.68          | 0.0770             |
|             | PAR                 | 37.63         | < 0.0001           |             | PAR                 | 0.04          | 0.8350             |
|             | tissue × time       | 21.08         | < 0.0001           |             | tissue × time       | 2.24          | 0.1150             |
|             | tissue × PAR        | 34.77         | < 0.0001           |             | tissue × PAR        | 0.56          | 0.4580             |
|             | time × PAR          | 22.08         | < 0.0001           |             | time × PAR          | 2.31          | 0.1340             |
|             | tissue × time × PAR | 24.20         | < 0.0001           |             | tissue × time × PAR | 0.62          | 0.4350             |
| <b>Thr</b>  | <b>tissue</b>       | <b>93.55</b>  | <b>&lt; 0.0001</b> | <b>Phe</b>  | <b>tissue</b>       | <b>70.27</b>  | <b>&lt; 0.0001</b> |
| (Df: 1; 69) | time                | 2.91          | 0.0620             | (Df: 1; 69) | time                | 7.29          | 0.0010             |
|             | PAR                 | 0.01          | 0.9160             |             | PAR                 | 13.26         | 0.0010             |
|             | tissue × time       | 3.15          | 0.0500             |             | tissue × time       | 6.29          | 0.0030             |
|             | tissue × PAR        | 0.76          | 0.3870             |             | tissue × PAR        | 26.15         | < 0.0001           |
|             | time × PAR          | 2.23          | 0.1410             |             | time × PAR          | 0.14          | 0.7110             |
|             | tissue × time × PAR | 8.11          | 0.0060             |             | tissue × time × PAR | 0.00          | 0.9610             |
| <b>Asp</b>  | <b>tissue</b>       | <b>122.14</b> | <b>&lt; 0.0001</b> | <b>Glu</b>  | <b>tissue</b>       | <b>3.13</b>   | <b>0.0820</b>      |
| (Df: 1; 69) | time                | 2.30          | 0.1090             | (Df: 1; 69) | time                | 4.28          | 0.0180             |
|             | PAR                 | 0.43          | 0.5140             |             | PAR                 | 1.60          | 0.2110             |
|             | tissue × time       | 1.10          | 0.3380             |             | tissue × time       | 0.40          | 0.6730             |
|             | tissue × PAR        | 0.22          | 0.6390             |             | tissue × PAR        | 1.45          | 0.2330             |
|             | time × PAR          | 8.90          | 0.0040             |             | time × PAR          | 5.42          | 0.0230             |
|             | tissue × time × PAR | 8.58          | 0.0050             |             | tissue × time × PAR | 11.04         | 0.0020             |
| <b>Asn</b>  | <b>tissue</b>       | <b>98.29</b>  | <b>&lt; 0.0001</b> | <b>Gln</b>  | <b>tissue</b>       | <b>14.96</b>  | <b>&lt; 0.0001</b> |
| (Df: 1; 69) | time                | 10.018        | < 0.0001           | (Df: 1; 69) | time                | 1.59          | 0.2130             |
|             | PAR                 | 3.65          | 0.0610             |             | PAR                 | 6.12          | 0.0160             |
|             | tissue × time       | 10.386        | < 0.0001           |             | tissue × time       | 11.21         | < 0.0001           |
|             | tissue × PAR        | 3.141         | 0.0810             |             | tissue × PAR        | 0.79          | 0.3770             |
|             | time × PAR          | 4.016         | 0.0500             |             | time × PAR          | 16.36         | < 0.0001           |

|             |                      |               |                    |                  |                            |               |                    |
|-------------|----------------------|---------------|--------------------|------------------|----------------------------|---------------|--------------------|
|             | tissue × time × PAR  | 3.515         | 0.0660             |                  | tissue × time × PAR        | 2.28          | 0.1360             |
| <b>Tyr</b>  | <b>tissue</b>        | <b>54.45</b>  | <b>&lt; 0.0001</b> | <b>Gly</b>       | tissue                     | <b>54.53</b>  | <b>&lt; 0.0001</b> |
| (Df: 1; 59) | <b>time</b>          | <b>46.64</b>  | <b>&lt; 0.0001</b> | (Df: 1; 69)      | time                       | <b>6.05</b>   | <b>0.0040</b>      |
|             | PAR                  | 2.87          | 0.0960             |                  | PAR                        | 2.83          | 0.0980             |
|             | <b>tissue × time</b> | <b>28.77</b>  | <b>&lt; 0.0001</b> |                  | tissue × time              | <b>5.40</b>   | <b>0.0070</b>      |
|             | tissue × PAR         | 0.48          | 0.4900             |                  | tissue × PAR               | <b>8.36</b>   | <b>0.0050</b>      |
|             | time × PAR           | 3.47          | 0.0690             |                  | time × PAR                 | 1.08          | 0.3030             |
|             | tissue × time × PAR  | 1.42          | 0.2400             |                  | tissue × time × PAR        | 0.05          | 0.8250             |
| <b>Arg</b>  | <b>tissue</b>        | <b>124.59</b> | <b>&lt; 0.0001</b> | <b>Lys</b>       | tissue                     | <b>334.46</b> | <b>&lt; 0.0001</b> |
| (Df: 1; 69) | <b>time</b>          | <b>9.33</b>   | <b>&lt; 0.0001</b> | (Df: 1; 49)      | time                       | <b>16.97</b>  | <b>&lt; 0.0001</b> |
|             | PAR                  | 3.28          | 0.0750             |                  | PAR                        | <b>19.63</b>  | <b>&lt; 0.0001</b> |
|             | <b>tissue × time</b> | <b>9.55</b>   | <b>&lt; 0.0001</b> |                  | tissue × time              | <b>25.78</b>  | <b>&lt; 0.0001</b> |
|             | tissue × PAR         | 3.43          | 0.0690             |                  | tissue × PAR               | <b>37.77</b>  | <b>&lt; 0.0001</b> |
|             | time × PAR           | 1.10          | 0.2980             |                  | time × PAR                 | <b>22.73</b>  | <b>&lt; 0.0001</b> |
|             | tissue × time × PAR  | 1.46          | 0.2320             |                  | tissue × time × PAR        | 3.93          | 0.0540             |
| <b>Trp</b>  | tissue               | <b>6.44</b>   | <b>0.0140</b>      | <b>Total AAs</b> | tissue                     | <b>253.00</b> | <b>&lt; 0.0001</b> |
| (Df: 1; 64) | time                 | 1.41          | 0.2540             | (Df: 1; 69)      | <b>time</b>                | <b>6.67</b>   | <b>0.0024</b>      |
|             | PAR                  | 3.48          | 0.0680             |                  | PAR                        | 0.37          | 0.5452             |
|             | tissue × time        | 1.42          | 0.2510             |                  | <b>tissue × time</b>       | <b>5.97</b>   | <b>0.0043</b>      |
|             | tissue × PAR         | 3.70          | 0.0600             |                  | tissue × PAR               | 3.50          | 0.0663             |
|             | time × PAR           | 2.77          | 0.1020             |                  | <b>time × PAR</b>          | <b>9.78</b>   | <b>0.0027</b>      |
|             | tissue × time × PAR  | 2.93          | 0.0930             |                  | <b>tissue × time × PAR</b> | <b>8.02</b>   | <b>0.0063</b>      |

---
