# Supplementary material for: Carbon and Nitrogen Allocation between the Sink and Source Leaf Tissue in Response to the Excess Excitation Energy Conditions
Source: MDPI journal article supplement (doi:10.3390/ijms24032269), 2023-01-23
Supplement: s1 [file s1]

**Table S5.** Three-way ANOVA results for the effects of tissue type (GL and WL), time point (9<sup>th</sup> and 13<sup>th</sup> day) and two PAR intensities as well as their interaction on the content of the cell-wall bound phenolic compounds found in the leaves of *P. zonale* plants. Experimental conditions were as described in Figure 4. The *Dfs* are shown in the brackets (the first number represents *Df* of the main effects and their interactions and the second number is *Df* of error). CA der, caffeic acid derivative; *p*-CA, *p*-coumaric acid.

| <b>COLD + HL experiment</b>                         |                     |              |                     |                                                    |                     |              |                     |
|-----------------------------------------------------|---------------------|--------------|---------------------|----------------------------------------------------|---------------------|--------------|---------------------|
| Trait                                               | Source of variation | <i>F</i>     | <i>P</i> > <i>F</i> | Trait                                              | Source of variation | <i>F</i>     | <i>P</i> > <i>F</i> |
| <b><i>p</i>-CA aldehyde</b><br>( <i>Df</i> : 1; 69) | tissue              | 2.49         | 0.1199              | <b>CA der 2</b><br>( <i>Df</i> : 1; 69)            | tissue              | <b>65.55</b> | <b>&lt; 0.0001</b>  |
|                                                     | time                | <b>6.58</b>  | <b>0.0026</b>       |                                                    | time                | <b>39.58</b> | <b>&lt; 0.0001</b>  |
|                                                     | PAR                 | <b>20.23</b> | <b>&lt; 0.0001</b>  |                                                    | PAR                 | <b>53.52</b> | <b>&lt; 0.0001</b>  |
|                                                     | tissue × time       | 2.17         | 0.1231              |                                                    | tissue × time       | <b>34.18</b> | <b>&lt; 0.0001</b>  |
|                                                     | tissue × PAR        | 3.06         | 0.0853              |                                                    | tissue × PAR        | <b>51.83</b> | <b>&lt; 0.0001</b>  |
|                                                     | time × PAR          | <b>13.00</b> | <b>0.0006</b>       |                                                    | time × PAR          | <b>50.44</b> | <b>&lt; 0.0001</b>  |
|                                                     | tissue × time × PAR | <b>10.21</b> | <b>0.0022</b>       |                                                    | tissue × time × PAR | <b>51.11</b> | <b>&lt; 0.0001</b>  |
| <b><i>p</i>-CA</b><br>( <i>Df</i> : 1; 69)          | tissue              | <b>48.58</b> | <b>&lt; 0.0001</b>  | <b><i>p</i>-CA alcohol</b><br>( <i>Df</i> : 1; 69) | tissue              | <b>10.06</b> | <b>0.0024</b>       |
|                                                     | time                | 3.11         | 0.0519              |                                                    | time                | <b>6.35</b>  | <b>0.0031</b>       |
|                                                     | PAR                 | <b>11.88</b> | <b>0.0010</b>       |                                                    | PAR                 | <b>19.65</b> | <b>&lt; 0.0001</b>  |
|                                                     | tissue × time       | 1.25         | 0.2943              |                                                    | tissue × time       | 0.06         | 0.9450              |
|                                                     | tissue × PAR        | 0.00         | 0.9650              |                                                    | tissue × PAR        | <b>16.66</b> | <b>0.0001</b>       |
|                                                     | time × PAR          | <b>6.36</b>  | <b>0.0144</b>       |                                                    | time × PAR          | <b>4.83</b>  | <b>0.0319</b>       |
|                                                     | tissue × time × PAR | 1.52         | 0.2223              |                                                    | tissue × time × PAR | 3.57         | 0.0637              |
