# Supplementary material for: Carbon and Nitrogen Allocation between the Sink and Source Leaf Tissue in Response to the Excess Excitation Energy Conditions
Source: MDPI journal article supplement (doi:10.3390/ijms24032269), 2023-01-23
Supplement: s1 [file s1]

**Table S4.** Two-way ANOVA results for the effects of time point (9<sup>th</sup> and 13<sup>th</sup> day) and two PAR intensities as well as their interaction on the Fw/Dw ratio *P. zonale* leaves. Experimental conditions were as described in Figure 4. The *Dfs* are shown in the brackets (the first number represents the *Df* of the main effects and their interactions and the second number is *Df* of error).

| Trait                | Source of variation | <i>F</i>     | <i>P</i> > <i>F</i> | Trait                | Source of variation | <i>F</i>     | <i>P</i> > <i>F</i> |
|----------------------|---------------------|--------------|---------------------|----------------------|---------------------|--------------|---------------------|
| FW/DW                | <b>time</b>         | <b>12.74</b> | <b>0.0001</b>       | FW/Dw                | Time                | 1.23         | 0.3054              |
| HL                   | <b>PAR</b>          | <b>21.25</b> | <b>0.0001</b>       | COLD+HL              | <b>PAR</b>          | <b>35.06</b> | <b>&lt; 0.0001</b>  |
| ( <i>Df</i> : 1; 39) | time × PAR          | 0.05         | 0.8217              | ( <i>Df</i> : 1; 39) | time × PAR          | 1.52         | 0.2257              |
