# Supplementary material for: Carbon and Nitrogen Allocation between the Sink and Source Leaf Tissue in Response to the Excess Excitation Energy Conditions
Source: MDPI journal article supplement (doi:10.3390/ijms24032269), 2023-01-23
Supplement: s1 [file s1]

**Table S7.** Sequences of forward and reverse primers used for the detection of selected transcripts.

| Gene         | Forward primer       | Reverse primer       |
|--------------|----------------------|----------------------|
| <i>POD17</i> | CCGAATCCATTGTCCGGGAT | CCTCCTTAGCTTCGTCGACC |
| <i>POD42</i> | ACCCGGGTCTTGTCATGAAC | CTCTCTCTCCACAGCCTCCT |
| <i>POD3</i>  | TGGGCAAGATGGGTTGTGTT | ACAGCACTGAGGCATCACAA |
| <i>MDAR</i>  | GAGGTGGAAATTCGGCTGGA | ACAAGTGTGGAAACCAGGCA |
| <i>DFR</i>   | CAAGCGGCTTGGAAGTATGC | GGCTTTGGGGTGCTCATACA |
| <i>Actin</i> | AGCTGAGAGATTCCGTTGCC | CCTTGCTCATCCTGTCAGCA |
| <i>CHS</i>   | GCCTTCGAGCCTTTGGGTAT | CAGCCCATCCTCACACGATT |
| <i>PAL</i>   | ACTTGAGGAAGTGAAGCGG  | ATCACTGCTCGCCTTCACTC |
| <i>ANS</i>   | AACCCTAACAAGTGGCCAC  | GGCTGAGGGCATTGTTGGTA |
| <i>AGXT</i>  | AGTGTGAAGAAAGCGGGAGG | TGCCAGTGTCACTATGTCCG |

*POD*, class III peroxidase; *MDAR*, monodehydroascorbate reductase; *DFR*, dihydroflavonol 4-reductase; *CHS*, chalcone synthase; *PAL*, phenylalanine ammonia lyase; *ANS*, anthocyanidin synthase; *AGXT*, alanine-glyoxylate aminotransferase;
