# Supplementary material for: Carbon and Nitrogen Allocation between the Sink and Source Leaf Tissue in Response to the Excess Excitation Energy Conditions
Source: MDPI journal article supplement (doi:10.3390/ijms24032269), 2023-01-23
Supplement: s1 [file s1]

**Table S2.** Repeated-measures analysis of variance (profile analysis) on EpFlav and Chl accumulation determined during 13 days of the *HL* and *Cold+HL* experiments in the leaves of *P. zonale* plants. Experimental conditions were as described in Figure 2. The *Dfs* are shown in the brackets (the first number represents the *Df* of main effects and their interactions and the second number is the *Df* of error). Other abbreviations are explained in Figure 2.

| <b><i>HL experiment, source</i></b>        |                             |                    |                          |                 |
|--------------------------------------------|-----------------------------|--------------------|--------------------------|-----------------|
| <i>Between-subjects</i>                    | EpFlav ( <i>Df</i> : 1; 24) |                    | Chl ( <i>Df</i> : 1; 24) |                 |
|                                            | <i>F</i>                    | <i>P &gt; F</i>    | <i>F</i>                 | <i>P &gt; F</i> |
| PAR                                        | <b>97.23</b>                | <b>&lt; 0.0001</b> | <b>13.50</b>             | <b>0.0012</b>   |
| <i>Within-subjects</i>                     | EpFlav ( <i>Df</i> : 1; 12) |                    | Chl ( <i>Df</i> : 1; 12) |                 |
|                                            |                             |                    |                          |                 |
| Day                                        | <b>194.50</b>               | <b>&lt; 0.0001</b> | <b>2.33</b>              | <b>0.0474</b>   |
| Day × PAR                                  | <b>148.05</b>               | <b>&lt; 0.0001</b> | 1.55                     | 0.1798          |
| <b><i>COLD + HL experiment, source</i></b> |                             |                    |                          |                 |
| <i>Between-subjects</i>                    | EpFlav ( <i>Df</i> : 1; 24) |                    | Chl ( <i>Df</i> : 1; 24) |                 |
|                                            | <i>F</i>                    | <i>P &gt; F</i>    | <i>F</i>                 | <i>P &gt; F</i> |
| PAR                                        | <b>315.82</b>               | <b>&lt; 0.0001</b> | 0.02                     | 0.8837          |
| <i>Within-subjects</i>                     | EpFlav ( <i>Df</i> : 1; 12) |                    | Chl ( <i>Df</i> : 1; 12) |                 |
|                                            |                             |                    |                          |                 |
| Day                                        | <b>249.86</b>               | <b>&lt; 0.0001</b> | <b>2.3874</b>            | <b>0.0300</b>   |
| Day × PAR                                  | <b>208.86</b>               | <b>&lt; 0.0001</b> | 1.1568                   | 0.3325          |
