# Supplementary figures and images for: Carbon and Nitrogen Allocation between the Sink and Source Leaf Tissue in Response to the Excess Excitation Energy Conditions
Source: MDPI journal article supplement (doi:10.3390/ijms24032269), 2023-01-23

HL

COLD+HL

G

W

G

W

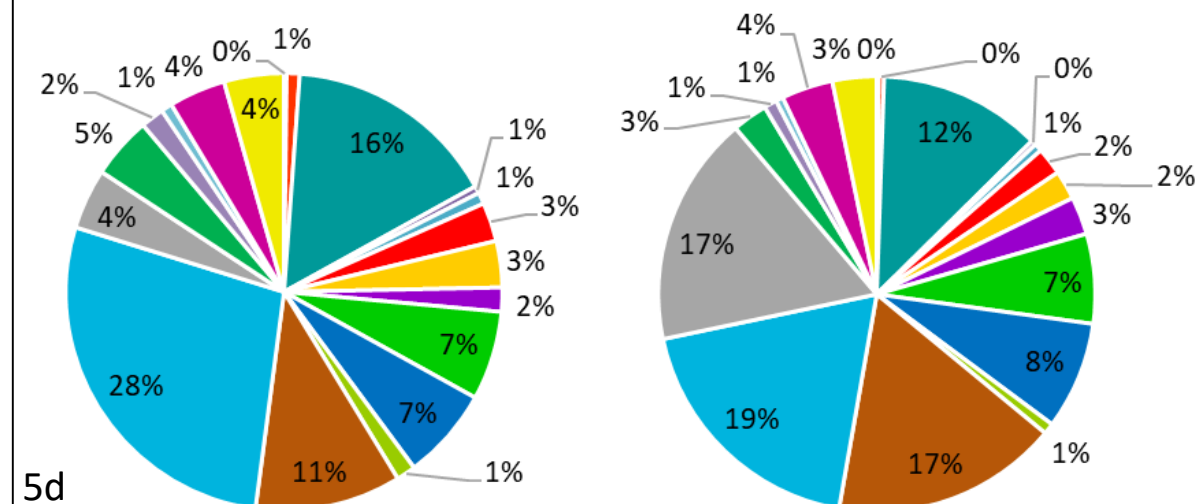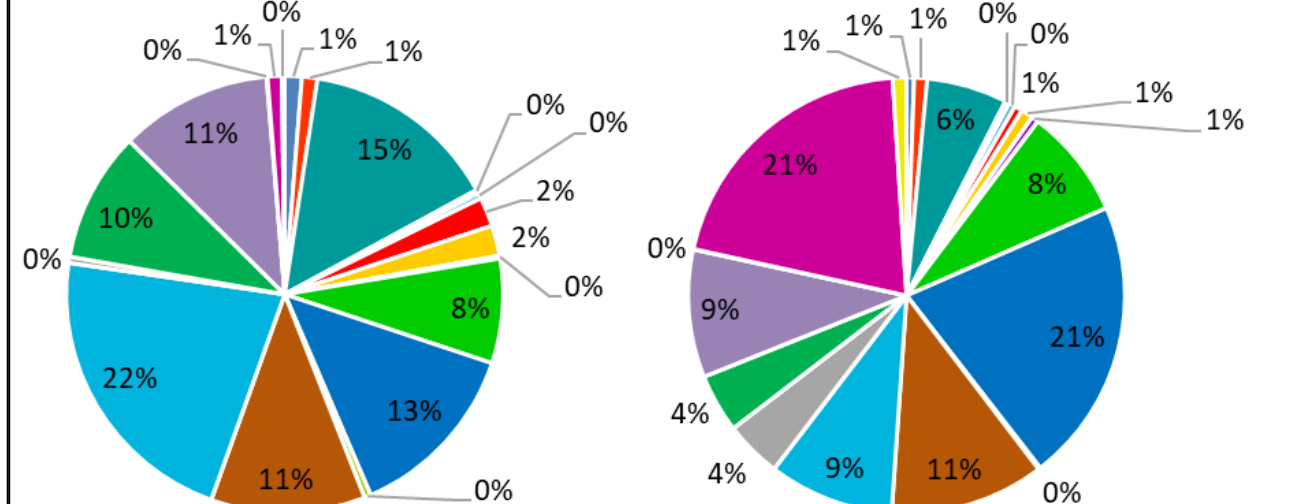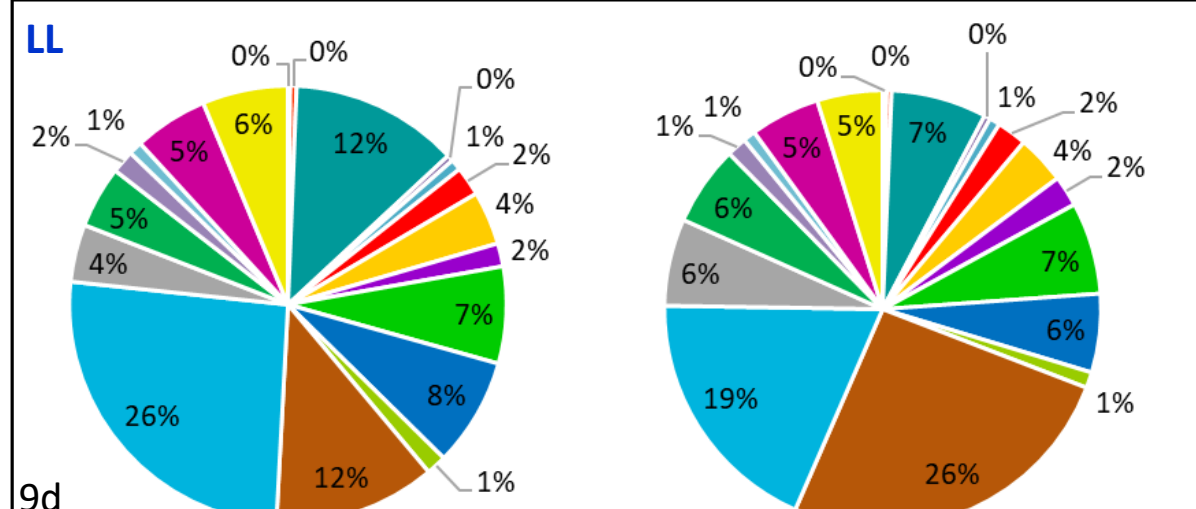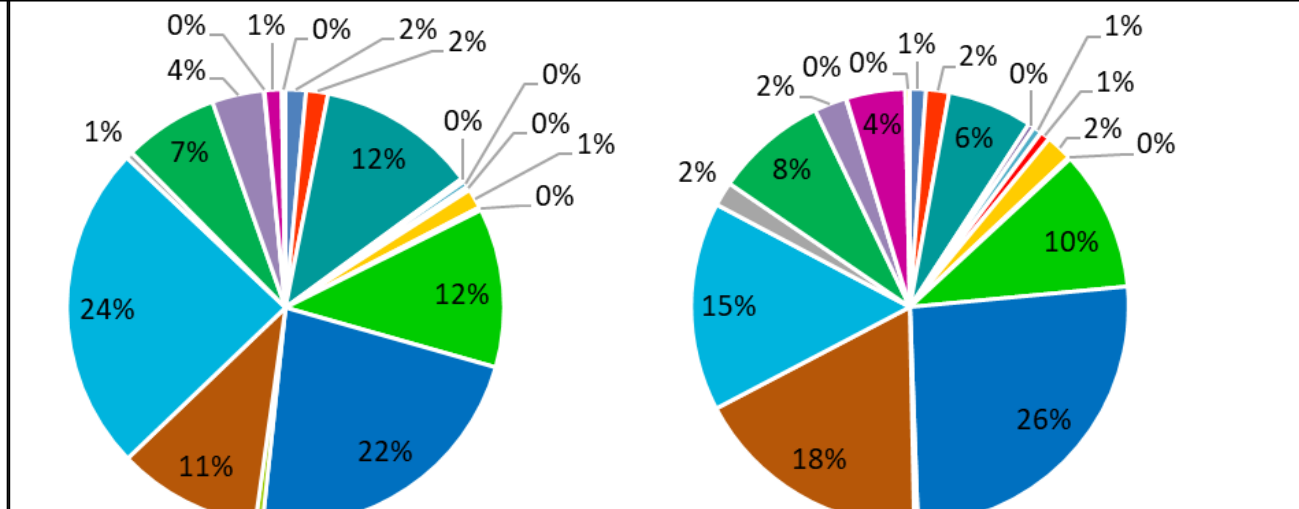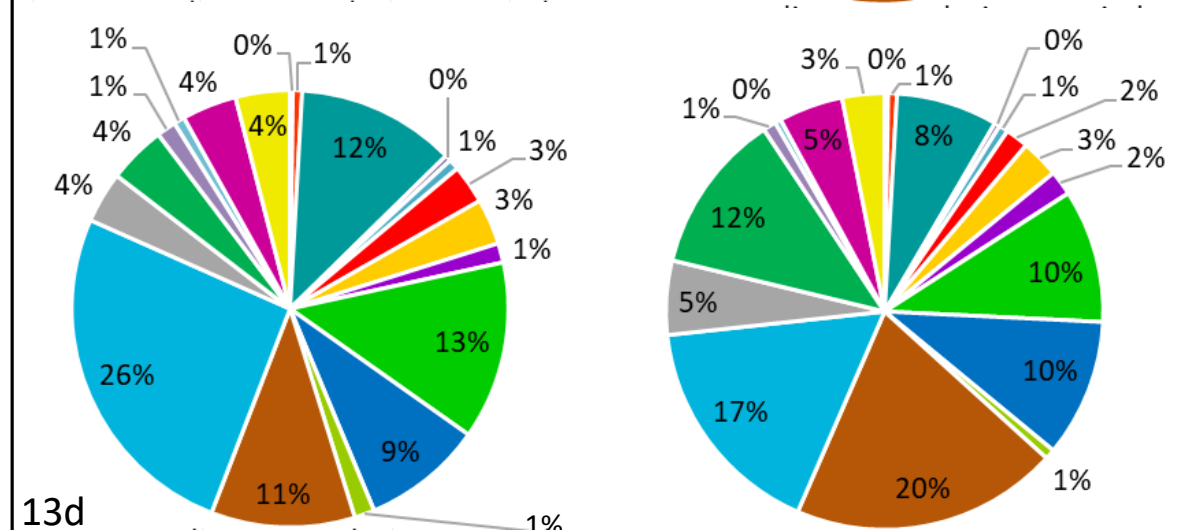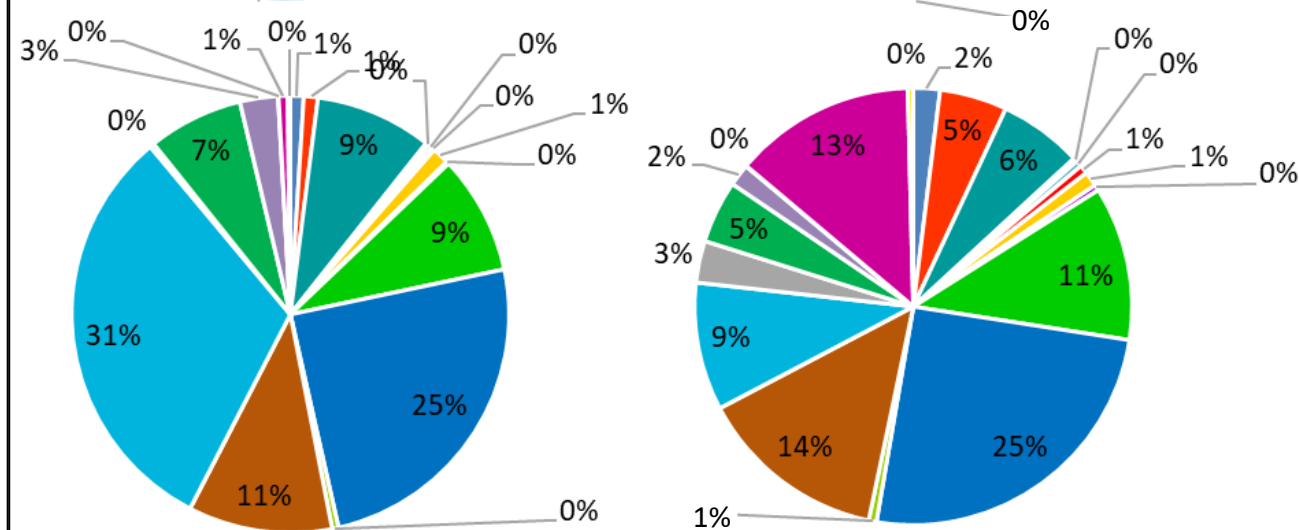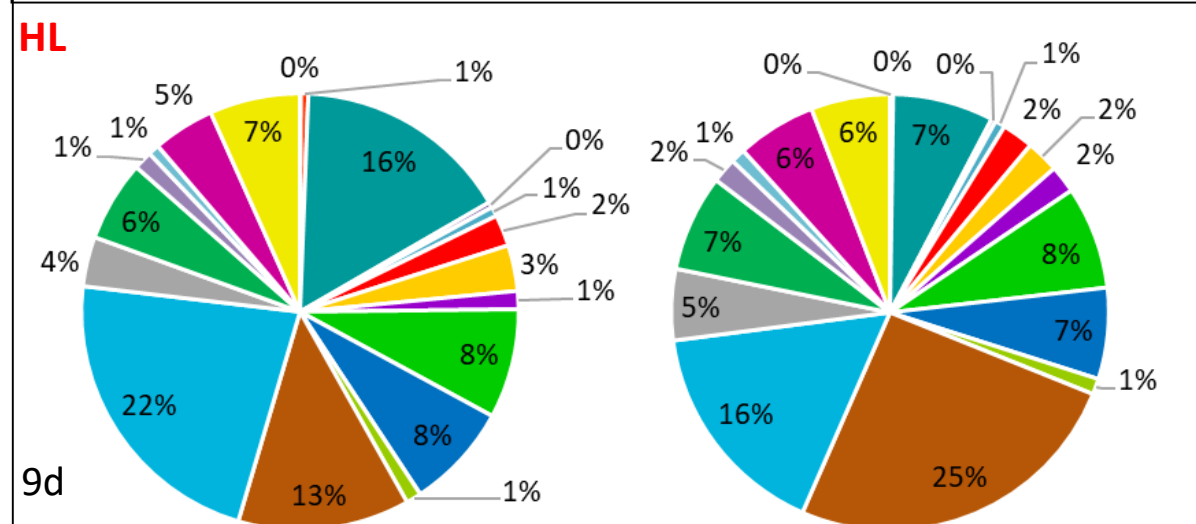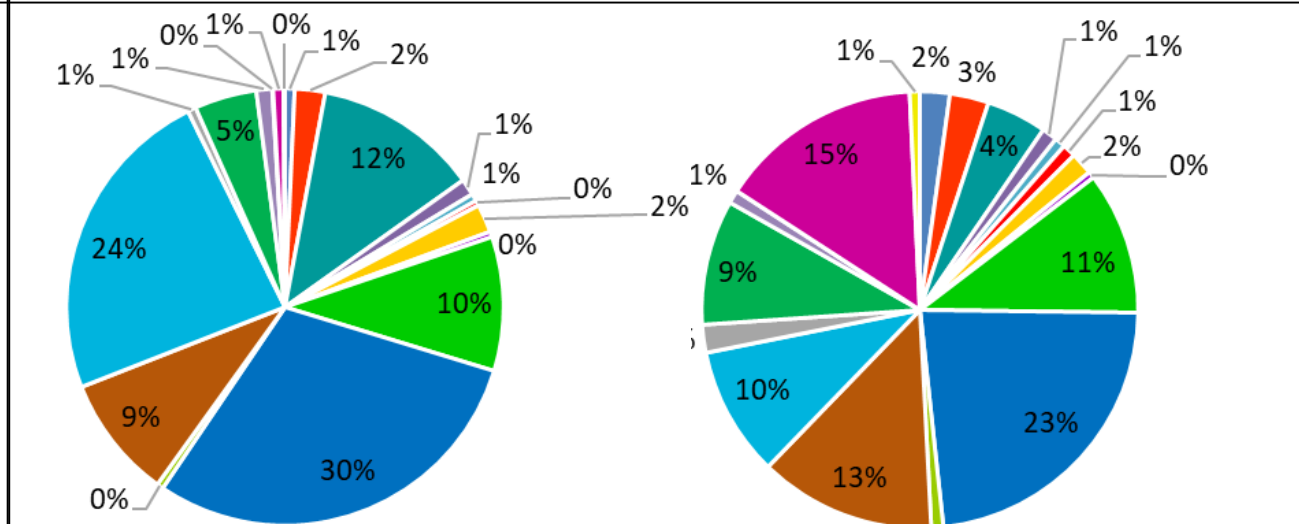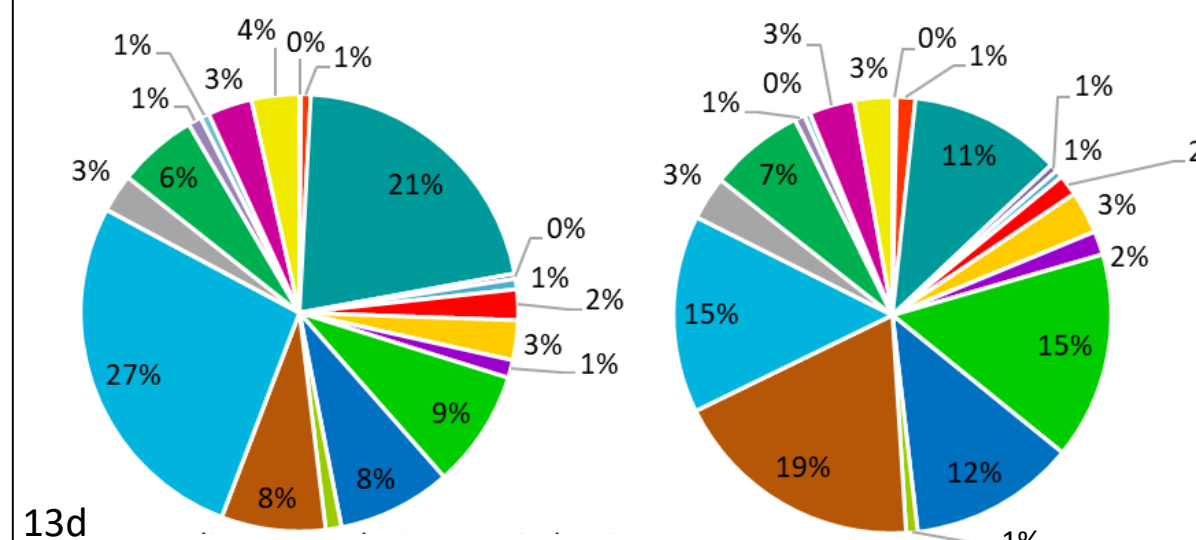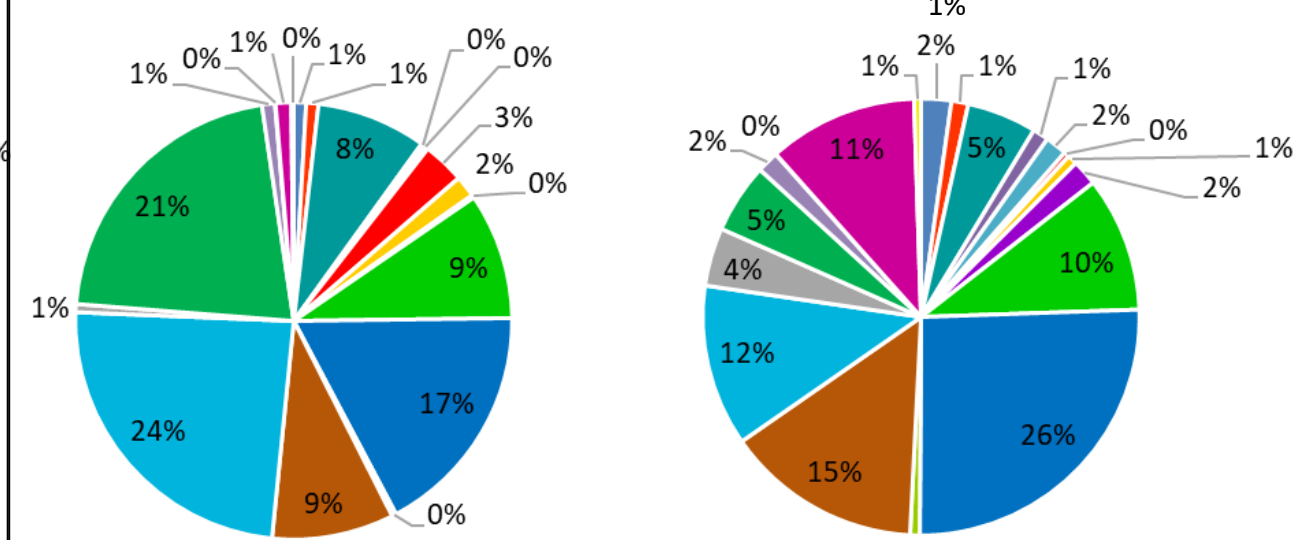

Gly Val Ala Ile Leu GABA Pro Met Ser Thr  
 Phe Asp Glu Asn Gln Tyr Cys Arg Trp

Supplement: s1 [file s1]

5 day

7 day

9day

11 day

13 day

**A) Wrapped leaves**

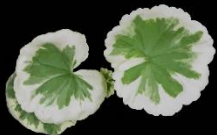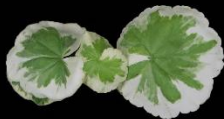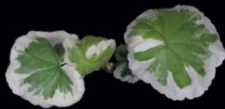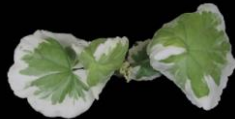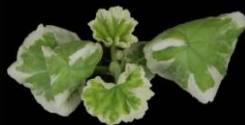

**B) Accumulation of anthocyanins**

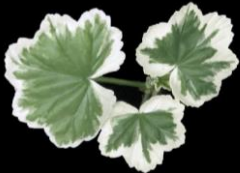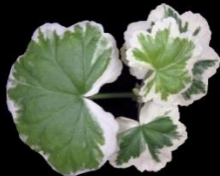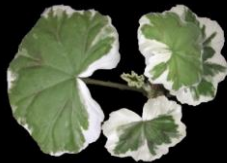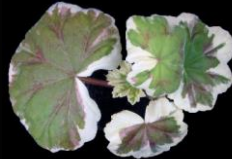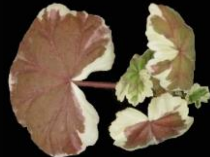

Supplement: s1 [file s1]
